# Supplementary material
Source: PubMed Central journal article supplement (PMC7260945)
Supplement: pnas.1918685117.sapp.pdf [file pnas.1918685117.sapp.pdf]

1

## 2 **Supplementary Information for**

### 3 **Massively parallel CRISPRi assays reveal concealed thermodynamic determinants of** 4 **dCas12a binding**

5 **David A. Specht, Yasu Xu and Guillaume Lambert**

6 **Guillaume Lambert.**

7 **E-mail: [lambert@cornell.edu](mailto:lambert@cornell.edu)**

#### 8 **This PDF file includes:**

9     Supplementary text

10    Figs. S1 to S7

11    Legends for Dataset S1 to S3

#### 12 **Other supplementary materials for this manuscript include the following:**

13     Datasets S1 to S3

## 14 Supporting Information Text

### 15 1. Massively parallel CRISPR interference assay

#### 16 Growth rate from sequencing counts.

17 Each experiment contains a total of  $n$  different crRNA:DNA combinations. The total number of transformant after plasmid  
18 assembly is  $M_T = \sum_{i=1}^n x_i$ , where  $x_i$  is the number of cells with a specific crRNA-target DNA combination  $i$ . If the assembly of  
19 each feature  $x_i$  does not depend on the underlying DNA sequence, the distribution of  $x_i$  will be given by a Poisson distribution  
20 with rate  $\frac{M_T}{n}$ .

21 The sample is then grown under two different selection conditions (K and SK) until it reaches an optical density  $OD_{600}=1$ .  
22 The time needed for each the population to reach  $OD_{600}=1$  in each condition is given by  $\tau_K$  and  $\tau_S$ , respectively. Plasmids are  
23 collected when each flask reaches  $OD=1$  and the region containing the crRNA and target DNA coding sequence is amplified  
24 using NEBNext Multiplex Oligos for Illumina (Index Primers Set 1).

25 Each sample is then sequenced using either the Miseq or iSeq 100 platform, and the number of times each crRNA-target  
26 DNA combination  $i$  is present in the population is denoted by  $K_i$  and  $S_i$  for cells grown under K and SK conditions, respectively.  
27 Each feature  $i$  will grow at a rate  $\Lambda_s^i$  under SK selection and at a constant rate  $\Lambda_k^i = \Lambda_0$  under K selection.

We define the relative fraction of each feature  $i$  in each condition according to:

$$\begin{cases} k_i = \frac{K_i}{\sum_i^n K_i} = \frac{x_i e^{\Lambda_0 \tau_k}}{M_1} \\ s_i = \frac{S_i}{\sum_i^n S_i} = \frac{x_i e^{\Lambda_s^i \tau_s}}{M_1} \end{cases} \quad [1]$$

28 where  $M_1$  is the number of cells at the end of the experiment when the flask reaches  $OD=1$ . To find the effective growth  
29 rate  $\Lambda_s^i$  under SK-condition for all other features  $i$ , we can re-arrange eqn. 1 to get

$$\Lambda_s^i = \frac{\log\left(\frac{s_i}{k_i}\right) + \Lambda_0 \tau_k}{\tau_s} \quad [2]$$

30 **Determining the growth time  $\tau_k$  under K-selection.** A subset of the population will not fully repress the tetA-sacB  
31 cassette and will not grow in SK conditions. This happens, for example, when the crRNA/target DNA Hamming distance  $\mathcal{H}$  is  
32 6. If we let  $s_-$  and  $k_-$  bet the population fraction under K and SK selection conditions of the non-growing subpopulation  $x_-$ ,  
33 we get

$$\begin{cases} k_- = \frac{x_- \exp(\Lambda_0 \tau_k)}{M_1} \\ s_- = \frac{x_-}{M_1} \end{cases} \quad [3]$$

34 Using this, we can find the time  $\tau_k$  cells were growing under K-selection from the ratio  $\frac{s_-}{k_-}$  and obtain

$$\tau_k = -\frac{1}{\Lambda_0} \log\left(\frac{s_-}{k_-}\right) \quad [4]$$

35 **Determining the growth time  $\tau_s$  under SK-selection.** Next, consider the subpopulation that is expected to grow at  
36 the same rate in either condition, which should occur when the crRNA/target DNA Hamming distance  $\mathcal{H}$  is zero. Using the  
37 population fractions in the K and SK conditions for this subpopulation (labeled  $s_+$  and  $k_+$ , respectively), we can use Eqn. 1 to  
38 find  $\tau_s$ :

$$\tau_s = \frac{1}{\Lambda_0} \log\left(\frac{s_+}{k_+}\right) + \tau_k \quad [5]$$

39 Here, we assume that the growth rate under SK conditions  $\Lambda_s^i$  is equal to the growth rate under K conditions  $\Lambda_0$  for all  
40 matched combinations –i.e. for crRNA-target DNA combinations Hamming distance  $\mathcal{H}$  equal to zero.

41 **Determining the growth rate  $\Lambda_s$  under SK-selection.** Having derived expressions for  $\tau_k$  and  $\tau_s$ , we can expand eqn. 2  
42 to get an expression for the relative growth rate  $\lambda_s^i \equiv \frac{\Lambda_s^i}{\Lambda_0}$  in terms of the  $s_{\pm}$  and  $k_{\pm}$  population fractions:

$$\lambda_s^i \equiv \frac{\Lambda_s^i}{\Lambda_0} = \frac{\log\left(\frac{s_i}{k_i}\right) - \log\left(\frac{s_-}{k_-}\right)}{\log\left(\frac{s_+}{k_+}\right) - \log\left(\frac{s_-}{k_-}\right)} \quad [6]$$

43 **Determining the growth rate  $\Lambda_t$  under TK-selection.** Using a similar approach, we also derive an analogous expression  
 44 of the growth rate  $\Lambda_t^i$  under TK-selection, assuming the  $t_+$  cells grow in TK when  $\mathcal{H}=6$  and the  $t_-$  cells do not grow when  $\mathcal{H}$   
 45 = 0. Specifically, we get:

$$\lambda_t^i \equiv \frac{\Lambda_t^i}{\Lambda_0} = \frac{\log\left(\frac{t_i}{k_i}\right) - \log\left(\frac{t_-}{k_-}\right)}{\log\left(\frac{t_+}{k_+}\right) - \log\left(\frac{t_-}{k_-}\right)} \quad [7]$$

46 **Determining the initial population sizes  $x_i$ .** While the size of each founding population  $x_i$  cancels out in our analysis, we  
 47 still need to find its probabilistic distribution in order to compute its expected variance from the measured number of counts.  
 48 Specifically, if we consider the measured population fraction under K-selection:

$$k_i = \frac{x_i \exp(\Lambda_0 \tau_k)}{M_1}$$

49 we note that since the factor  $\frac{\exp(\Lambda_0 \tau_k)}{M_1}$  is common to all sequences, we can set  $x_i = k_i$ .

## 50 2. Thermodynamic model of CRISPR-Cas binding

51 **Measuring dCas12a occupancy from the grand canonical ensemble.** We use an auxiliary reporter system based on  
 52 sacB expression to measure the effective dCas12a occupancy  $\theta_c$  for the tested targets. The system is composed of a simple  
 53 CRISPR interference (CRISPRi) promoter architecture, where a protospacer adjacent motif (PAM) and a target DNA overlaps  
 54 with the -35 or -10 consensus site of the promoter (Fig. 2). Binding of an RNA-guide CRISPR-Cas endonuclease with  
 55 deactivated nuclease sites to the promoter prohibits initiation of RNA transcription by RNA polymerase (RNAP). In this  
 56 scenario, the binding energy of the CRISPR-Cas protein to its target DNA site is  $\epsilon_c$ , the RNAP binding energy is  $\epsilon_p$ , the PAM  
 57 site binding energy is  $\epsilon_{PAM}$ , and the grand partition function of this system is [1, 2]

$$\mathcal{Z} = 1 + \lambda_p e^{-\beta \epsilon_p} + \lambda_c e^{-\beta \epsilon_{PAM}} + \lambda_c e^{-\beta \epsilon_c} \quad [8]$$

58 where  $\beta = k_B T$ ,  $\mu_p$  and  $\mu_c$  are the RNAP and dCas12a chemical potentials  $\lambda_p = e^{\beta \mu_p}$  and  $\lambda_c = e^{\beta \mu_c}$  are the RNAP and  
 59 dCas12a fugacities.

60 Using  $\mathcal{Z}$ , we derive an expression for the fold-change  $FC$ , defined as the ratio of the average number of absorbed RNAP  
 61 molecules with and without repressor molecules [1, 2], and get

$$FC \equiv \frac{\langle N_c \rangle_{R \neq 0}}{\langle N_c \rangle_{R=0}} = \frac{1}{1 + \lambda_c e^{-\beta \epsilon_c}} \quad (\lambda_p e^{-\beta \epsilon_p}, \lambda_c e^{-\beta \epsilon_{PAM}} \ll 1) \quad [9]$$

62 Here, we used the weak promoter limit  $\lambda_p e^{-\beta \epsilon_p} \ll 1$  because the RNAP typically initiates RNA transcription immediately  
 63 after binding to the promoter and does not occupy the promoter for a long time (i.e. it binds to the promoter in a manner that  
 64 appears as though its binding energy is very weak). Similarly, we used a weak PAM binding limit  $\lambda_c e^{-\beta \epsilon_{PAM}} \ll 1$  because we  
 65 assume that the dCas12a protein typically does not remain in the PAM-bound state for a long time (approximately 0.13s  
 66 according to single-molecule studies [3]) and will only transition into a stable ternary complex if sufficient crRNA-DNA  
 67 homology is found.

68 The average dCas12a occupancy is

$$\theta_c = \frac{\lambda_c e^{-\beta \epsilon_c}}{1 + \lambda_c e^{-\beta \epsilon_c}} \quad [10]$$

$$(\lambda_p e^{-\beta \epsilon_p}, \lambda_c e^{-\beta \epsilon_{PAM}} \ll 1) \quad [11]$$

69 In terms of the fold-change,  $\theta_c$  becomes

$$\theta_c = 1 - FC \quad [12]$$

Starting with the fold-change under equilibrium conditions, an easy to measure quantity obtained by directly measuring levels of protein or RNA in Fig. 2B and C, we can extract the effective dCas12a occupancy. In Fig. 2C, the fold-change for a perfectly matching crRNA-DNA hybrid measured using ddPCR is 1/207, meaning that the quantity  $\lambda_c e^{-\beta \epsilon_c} = 206$  and the dCas12a occupancy  $\theta_c$  is  $122/123 = 99.5\%$ . In addition, dCas12a levels (101 molecules per  $\mu\text{L}$  of cell extract) are comparable with levels of KanR (129 per  $\mu\text{L}$  of cell extract), suggesting that the number of dCas12a proteins should exceed the number of DNA targets present on the pSC101 plasmid (copy number = 5) in each cell. Additional ddPCR measurements also confirm that crRNA levels (4890 per  $\mu\text{L}$  of cell extract) are much higher than the number of dCas12a proteins and should be present at saturating concentrations.

We can also extract the average PAM site occupancy  $\theta_{PAM}$  according to

$$\theta_{PAM} = \frac{\lambda_c e^{-\beta \epsilon_{PAM}}}{\mathcal{Z}} = \frac{\lambda_c e^{-\beta \epsilon_{PAM}}}{1 + \lambda_c e^{-\beta \epsilon_c}} \quad [13]$$

It is important to note that the presence of competitor sites may sequester some of the available dCas12a proteins and effectively reduce the PAM and dCas12a occupancies. However, we find no potential PAM site and target DNA sequence within the *E. coli* genome that contains significant sequence overlap ( $>15\text{bp}$ ) with any of the crRNA sequences tested. Note that equations 11 and 13 are only valid for the equilibrium measurements of GFP protein and mRNA levels presented in Fig. 2B and C.

**Measuring dCas12a occupancy from transition state theory.** We next describe dCas12a binding/unbinding considering the rate of transition between these two states. First, to describe how dCas12a recognizes and binds to its DNA target after the PAM attachment step, we note that the initial attachment step involves recognition of a PAM site by a crRNA-loaded dCas12a endonuclease. This recognition step depends on the specific PAM sequence, and leads to a conversion into a fully-bound state at a rate  $\nu$  if sufficient crRNA-target DNA homology is found. Then, once stably bound, the only way for Cas12a to unbind its target DNA is to be destabilized by the DNA replication machinery [4], which occurs at a rate  $\Lambda$ .

Using this kinetic approach, the number of bound dCas12a to a DNA site with PAM binding energy  $\epsilon_{PAM}$ , a (PAM) $\rightarrow$ (stable complex) transition probability given by the reconfiguration rate  $\nu$ , and a DNA replication rate  $\Lambda$ , is given by

$$\dot{N}_c = \nu N_{PAM} - \Lambda N_c \quad [14]$$

where  $N_c$  and  $N_{PAM}$  are the number of dCas12a proteins bound to their target DNA and bound to the PAM site, respectively.

At steady state, we note that  $N_{tot} \theta_{PAM} = N_{PAM}$  to derive an expression for  $\theta_c$  and get

$$\theta_c = \frac{\nu}{\Lambda} \theta_{PAM} \quad [15]$$

To find  $\theta_{PAM}$ , we can extract the sequence-specific binding energy  $\epsilon_{PAM} = \sum \epsilon_b^i$  by keeping the same target DNA and measuring  $\theta_c$  for different PAM sequences. Specifically, a PAM sequence which deviates from the canonical PAM site sequence will have a binding energy given by  $\epsilon'_{PAM} = \epsilon_{canon} + \Delta \epsilon_{PAM}$ , which will decrease the PAM occupancy  $\theta_{PAM}$  by a factor  $e^{-\beta \Delta \epsilon_{PAM}}$  in the weak PAM binding limit .

To find  $\nu$ , we first assume that the (PAM) $\rightarrow$ (stable complex) transition occurs in a number of  $n$  discrete steps, and each step  $i$  can only transition to either state  $i - 1$  or  $i + 1$ . In this case, the transition rate from state 1 state  $n$  is simply given by:

$$\nu = \kappa \cdot e^{-\beta \sum_i^{n-1} \Delta \epsilon_i} \quad [16]$$

where  $\Delta \epsilon_i = \epsilon_{i+1} - \epsilon_i$  and  $\kappa$  is the basal rate at which dCas12a will bind to its target given a fully matching PAM and crRNA sequences.  $\kappa$  is assumed to be constant for all experimental conditions tested.

Note that Eqn. 16 does not consider the sequence of events leading to the transitions from  $i$  to  $n$  because addition is commutative, which means that this expression may not accurately describe the reconfiguration rate in the presence of multiple crRNA-target DNA mismatches. On the other hand, if only a single mismatch exists at location  $i$ , the new binding energy will be shifted by a fixed position-dependent energy  $\Delta \epsilon^*$  and the new rate  $\nu$  will be given by

$$\nu^* = \nu e^{-\beta \Delta \epsilon^*} \quad [17]$$

Combining equations 15 and 17, we obtain an explicit formulation of the relative binding probabilities between two targets:

$$\frac{\theta'_c}{\theta_c} = \frac{\Lambda}{\Lambda'} e^{-\beta \Delta \epsilon_{PAM}} \cdot e^{-\beta \Delta \epsilon^*} \quad [18]$$

107 When measured in *E. coli* bacteria, both the DNA replication rate and the thermodynamic determinants of dCas12a binding  
 108 will impact  $\theta'_c/\theta_c$ . We describe in the next section how we untangle both effects using our massively parallel CRISPRi assay.

109 In mammalian cells, on the other hand, DNA replication rates are not affected by CRISPR-Cas binding (i.e.  $\Lambda = \Lambda'$ ). In  
 110 this case, only the thermodynamic determinants associated with the PAM attachment probability and the reconfiguration rate  
 111 will have an impact on DNA binding probabilities. Since DNA binding is also directly related to DNA cleavage activity, the  
 112 relative indel frequency between two targets is thus given by

$$\text{Cleavage activity} \propto \frac{\theta'_c}{\theta_c} = e^{-\beta\Delta\epsilon_{PAM}} \cdot e^{-\beta\Delta\epsilon^*} \quad [19]$$

113 Thus, knowing the basic thermodynamic determinants of dCas12a binding can help determine the relative cleavage activity  
 114 between any two DNA targets.

**dCas12a occupancies from growth rate.** The tetA-sacB cassette is under the control of a dCas12a repressible promoter  
 whose fold-change expression (Eqn. 9) is given by

$$FC = \frac{1}{1 + \lambda_c e^{-\beta\epsilon}} \equiv f(\epsilon)$$

115 where the fugacity  $\lambda_c$  converges to the concentration of dCas12+crRNA binary complex in the  $[\text{crRNA}] \gg 1$  limit and  $\epsilon$  is  
 116 the effective binding energy of the stabilized dCas12+crRNA+DNA ternary complex.

117 We describe the kinetics of this system using this system of ODE equations:

$$\begin{cases} \frac{dS}{dt} &= \gamma f(\epsilon) - \Lambda S \\ \Lambda(S) &= \frac{\Lambda_0}{1 + \frac{sS(t)}{k_{1/2}}} \end{cases} \quad [20]$$

118 where  $S$  is the number of sacB molecules,  $s$  is the sucrose concentration,  $\gamma$  is the sacB production rate, and the growth rate  
 119  $\Lambda$  is given by sucrose-dependent Monod kinetics with  $k_{1/2}$  as the half-velocity constant and maximum growth rate  $\Lambda_0$ .

120 At steady-state, we get:

$$\begin{cases} S_0 &= \frac{\gamma f(\epsilon)}{\Lambda} \\ \Lambda(S_0) &= \frac{\Lambda_0}{1 + \frac{sS_0}{k_{1/2}}} \end{cases} \quad [21]$$

121 In Fig. S2, we measure the growth rate of cells with  $f(\epsilon) = 1$  (i.e. with a crRNA-target DNA Hamming distance  $\mathcal{H}$  equal to  
 122 6) as a function of sucrose concentration to find that the growth rate is equal to  $\Lambda_0/2$  when  $s_{1/2} = 0.6\%$  sucrose. Solving for  
 123  $k_{1/2}$ , we obtain

$$k_{1/2} = \frac{2\gamma s_{1/2}}{\Lambda_0} \quad [22]$$

124 Solving for  $\Lambda$ , we obtain

$$\lambda = \frac{\Lambda}{\Lambda_0} = 1 - \frac{s\gamma f(\epsilon)}{k_{1/2}\Lambda_0} = 1 - \frac{1}{2} \frac{s}{s_{1/2}} f(\epsilon) \quad [23]$$

125 Since the experiments were performed at a sucrose concentration of  $s = 4.5\%$ , we can rearrange Eqn. 23 to get

$$\lambda = 1 - \alpha f(\epsilon) \quad [24]$$

126 where  $\alpha = 4.5\%/0.6\%/2 = 3.75$ .

127 The dCas12a occupancy  $\theta_c$  is related to the fold-change and growth rate  $\lambda = \frac{\Lambda}{\Lambda_0}$  according to

$$\theta_c = 1 - f(\epsilon) = 1 - \frac{1 - \lambda}{\alpha} = \nu \frac{\theta_{PAM}}{\Lambda}. \quad [25]$$

128 Hence, given two arbitrary crRNA-target DNA configurations, the ratio of their dCas12a occupancies is

$$\frac{\theta'_c}{\theta_c} = \frac{\alpha - 1 + \lambda'}{\alpha - 1 + \lambda} = \frac{\lambda \nu' \theta'_{PAM}}{\lambda' \nu \theta_{PAM}}. \quad [26]$$

129 Noting that  $\alpha = 3.75$ , we obtain

$$e^{-\beta \Delta \epsilon_{PAM}} \cdot e^{-\beta \Delta \epsilon^*} = \frac{2.75 + \lambda' \lambda'}{2.75 + \lambda} \quad [27]$$

$$\approx \frac{\lambda'}{\lambda} \quad (\text{when } \lambda \approx 1) \quad [28]$$

130 where  $\Delta \epsilon_{PAM}$  and  $\Delta \epsilon^*$  are the PAM and mismatch binding energy differences, respectively, and  $\lambda$  is the growth rate of a  
131 reference combination with fully matching PAM and crRNA sequences.

132 Eqn. 28 allows us to untangle the contribution of the thermodynamic determinants of dCas12a binding from growth-  
133 dependent effects due to tetA-sacB expression. The magnitude of this effect can directly be tuned by changing the sucrose  
134 concentration in each experiment. For instance, sucrose concentrations near  $s_{1/2}$  are less sensitive to sequence-specific changes  
135 and growth measurements will correlate with sequence differences that greatly affect binding. Similarly, sucrose concentrations  
136 much larger than  $s_{1/2}$  will be more apt at differentiating between binding affinities that are very close to one another –for  
137 examples between two sequences with fully-matching crRNA-target DNA sequences, which were compressed near  $\lambda=1$  in all  
138 figures presented in this paper. Here, we purposely tuned the sucrose concentration (4.5%) to most sensitively respond to an  
139 intermediate level of binding that is representative of 1 or 2 crRNA-target DNA mismatches.

140 Note that Eqn. 28 is only valid in the regime where the ratio  $(2.75 + \lambda')/(2.75 + \lambda)$  is close to 1. This means dCas12a  
141 occupancy for sequences displaying a low growth rate will fall outside the bounds for which Eqn. 28 is valid. In addition,  
142 important physiological effects (such as the amount of dCas12a protein and mRNA present inside each cell) may negatively  
143 impact binding dynamics at slower growth rates, and the relative binding energy contribution described by Eqn. 28 may not  
144 be accurate.

145 Nevertheless, the thermodynamic determinants of dCas12a binding (parametrized as  $\epsilon_{PAM}$  and  $\Delta \epsilon^*$ ) can be used to evaluate  
146 the relative binding rate between different DNA targets with an intermediate level of binding (less than  $\sim 2$  crRNA-target DNA  
147 mismatches).

148 **Measuring dCas12a occupancy for TK selection.** When a crRNA regulates the expression of tetA or targets an essential  
149 gene, the growth rate  $\Lambda$  depends on the amount of tetA proteins  $T$  and tetracycline concentration  $[tet]$  in the cell. If we  
150 measure the growth rate of cells that constitutively express tetA as a function of tetracycline concentration (Fig. S2), we get  
151 that the half-max growth rate occurs for  $[tet]_{1/2} = 0.14 \mu\text{g/mL}$ . This means that the experiment were carried out at a  $10 \mu\text{g/mL}$   
152 tetracycline concentration, any fold-change  $f(\epsilon)$  smaller than  $\frac{0.14 \mu\text{g/mL}}{10 \mu\text{g/mL}} = 0.014$  will prevent cells from growing. Therefore,  
153 even a partially-repressed tetA-sacB cassette will decrease the amount of tetA in the cell and can in turn drastically reduce the  
154 growth rate. We are therefore unable to detect differences in dCas12a binding by monitoring the growth rate alone, and we  
155 mainly use the TK growth rates as a means to confirm repression trends observed under SK selection.

### 156 3. Model predictions

#### 157 Fitting the PAM attachment and mismatch costs.

158 According to Equation 19, two identical DNA targets that are flanked by different PAM sequence will have the same  
159 reconfiguration rate  $\nu$  but different PAM attachment energies, which in turn will yield different growth rates under SK  
160 conditions. In our model, the PAM attachment energy is defined as  $\epsilon_{PAM} = \sum_i \epsilon_b^i$ , where  $\epsilon_b^i$  is the specific binding energy of a  
161 base of type  $b=(T,C,G,A)$  at location  $i=(1..6)$ . In Fig. 3F and G, we use SK growth rates for PAM sites of the form NNNTTV  
162 to compute the position-dependent binding energies  $\epsilon_b^i$ .

163 First, we computed a baseline value for all  $e^{-\beta \epsilon_b^i}$ , the Boltzmann weight of base  $b=(T, C, G, A)$  at location  $i$ , by averaging  
164 all the growth rates of the PAM of the form NNNTTV. Specifically,

$$e^{-\beta \epsilon_b^i} = \begin{cases} e^{-\beta \epsilon_b^6} = \langle \lambda(bTTTTV) \rangle \\ e^{-\beta \epsilon_b^5} = \langle \lambda(TbTTTTV) \rangle \\ e^{-\beta \epsilon_b^4} = \langle \lambda(TTbTTTTV) \rangle \\ e^{-\beta \epsilon_b^3} = 1 \text{ if } b=T, 0 \text{ otherwise} \\ e^{-\beta \epsilon_b^2} = 1 \text{ if } b=T, 0 \text{ otherwise} \\ e^{-\beta \epsilon_b^1} = \langle \lambda(NTTTTTb) \rangle \end{cases} \quad [29]$$

165 where the brackets  $\langle \cdot \rangle$  signify averages over either  $V=(C, G, A)$  or  $N=(T, C, G, A)$ .

166 This process first yielded this unoptimized energy “matrix”:

| TTV PAM site           | -6   | -5   | -4   | -3   | -2   | -1   |
|------------------------|------|------|------|------|------|------|
| $e^{-\beta\epsilon_T}$ | 0.91 | 0.91 | 0.91 | 1.00 | 1.00 | 0.14 |
| $e^{-\beta\epsilon_C}$ | 0.94 | 0.91 | 0.48 | 0.00 | 0.00 | 0.92 |
| $e^{-\beta\epsilon_G}$ | 0.92 | 0.87 | 0.38 | 0.00 | 0.00 | 0.92 |
| $e^{-\beta\epsilon_A}$ | 0.90 | 0.91 | 0.25 | 0.00 | 0.00 | 0.91 |

167

168 We then optimized the energy matrix for the TTV PAM sites by performing 1,000 optimization steps where we 1) added  
169 normally distributed noise  $\mathcal{N}(\mu = 0, \sigma^2 = 0.001)$  to each value of the energy matrix, 2) used the new matrix to compute new  
170 predicted values for  $\lambda(PAM)$  for the TTV PAM sites, 4) performed a least-square fit of the predicted vs. measured growth  
171 rate values, and 5) updated the value of the energy matrix only if the least-square fit was smaller than in the previous iteration.  
172 The optimized matrix is shown in Fig. 3G.

173 A similar procedure was followed to extract an optimized energy matrix for the combined TTTV and TTTTV PAM data,  
174 obtaining

| (T)TTTV PAM site       | -6   | -5   | -4   | -3   | -2   | -1   |
|------------------------|------|------|------|------|------|------|
| $e^{-\beta\epsilon_T}$ | 0.96 | 1.00 | 1.03 | 1.00 | 1.00 | 0.23 |
| $e^{-\beta\epsilon_C}$ | 1.10 | 1.25 | 0.41 | 0.00 | 0.00 | 0.99 |
| $e^{-\beta\epsilon_G}$ | 0.96 | 0.98 | 0.64 | 0.00 | 0.00 | 0.99 |
| $e^{-\beta\epsilon_A}$ | 0.97 | 0.98 | 0.29 | 0.00 | 0.00 | 0.99 |

175

176 The predicted values for the TTV PAM sites were computed from the energy matrix shown in Fig. 3G and those of the  
177 form (T)TTTV were computed from the (T)TTTV PAM site matrix above. The combined model has a predicted-measured  
178 Pearson correlation of 0.943.

179 We performed the same procedure to generate the mismatch energy matrix in Fig. 4E. In this case, we first computed the  
180 baseline position-dependent energy costs  $e^{-\beta\Delta\epsilon_i}$  from the values of the growth rate for individual mutations (Fig. 4C). This  
181 nonoptimized energy matrix is given by

| Position                       | 1    | 2    | 3    | 4    | 5    | 6    | 7    | 8    | 9    | 10   |
|--------------------------------|------|------|------|------|------|------|------|------|------|------|
| $e^{-\beta\Delta\epsilon_i^*}$ | 0.39 | 0.41 | 0.28 | 0.26 | 0.78 | 41   | 0.25 | 0.61 | 0.52 | 0.25 |
| Position                       | 11   | 12   | 13   | 14   | 15   | 16   | 17   | 18   | 19   | 20   |
| $e^{-\beta\Delta\epsilon_i^*}$ | 0.36 | 0.24 | 0.17 | 0.18 | 0.23 | 0.65 | 0.75 | 0.83 | 1.05 | 1.07 |

182

183 We used this initial set of values for  $e^{-\beta\Delta\epsilon_i^*}$  to evaluate the accuracy of the model prediction in computing the growth rate  
184 for crRNA that contain two mismatches from  $\lambda(2MM) = e^{-\beta\sum_i \epsilon_i^*}$ . In this case, the Pearson correlation between the predicted  
185 and measured growth rate values is 0.769. By subjecting the position-dependent energy matrix to the fitting/optimization  
186 procedure described above for 10,000 steps, we obtained the set of values for  $e^{-\beta\Delta\epsilon_i^*}$  shown in Fig. 4F, which yields a Pearson  
187 correlation of 0.869.

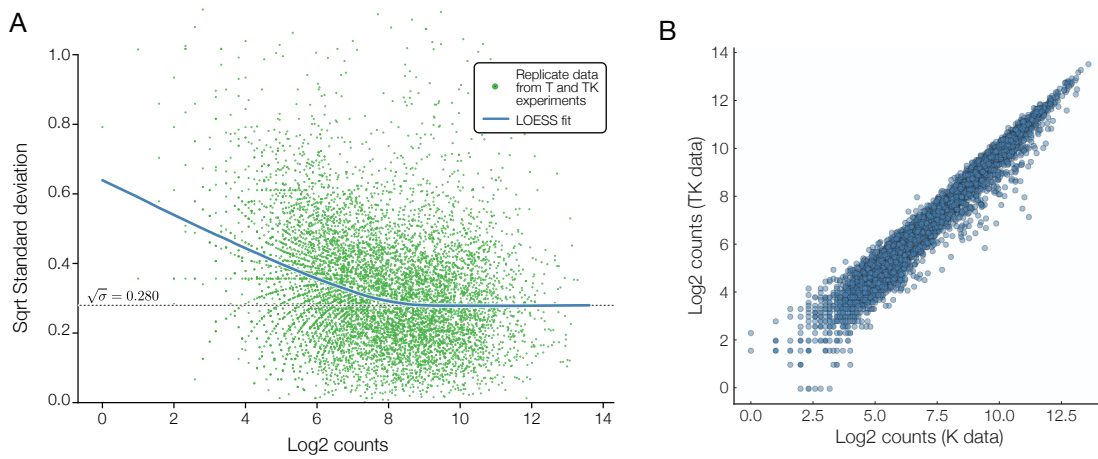

**Fig. S1.** Error calculations. A) Error bars are calculated using a LOESS fit [5] of the mean/variance relationship between experimental replicates of the fold change, inspired by the error estimation in [6]. In this figure, the standard deviation is computed from independent replicates sourced from the K and TK selection conditions with 6 mismatches in the seed sequence. B) Comparing the raw counts from the K and TK independent replicates.



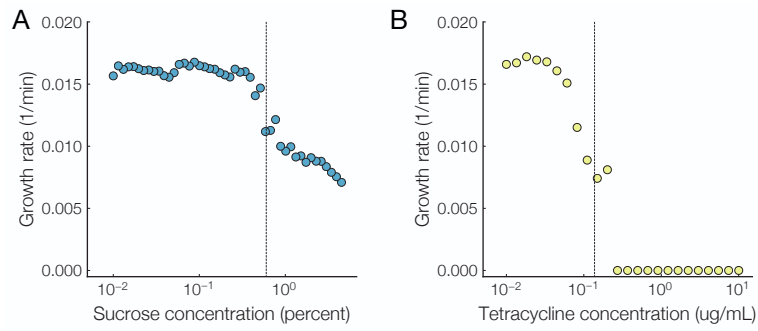

**Fig. S2.** Growth rate under sucrose and tetracycline. A) Sucrose-dependent growth rate for cells that fully express the tetA-sacB cassette. Transition between growth/no-growth occurs at 0.6%. B) Tetracycline-dependent growth rate for cells that fully express the tetA-sacB cassette. Transition between no-growth/growth occurs at 0.14  $\mu\text{g/mL}$ .

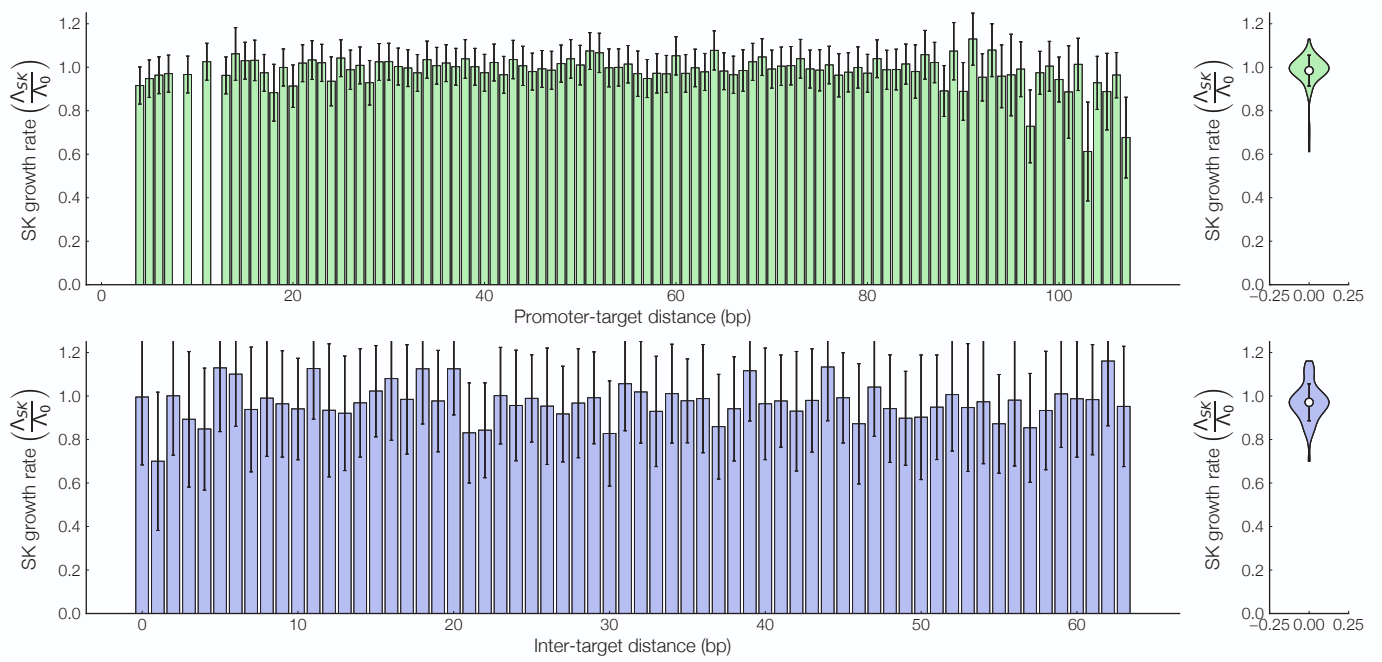

**Fig. S3.** Promoter-target and intra-target distances. Growth rate in SK conditions for inverter constructs which contain (A) a single target or (B) two targets located after the +1 location of the output promoter. Violin plots of the distribution of all constructs is shown on the left. Error bars = std. dev.

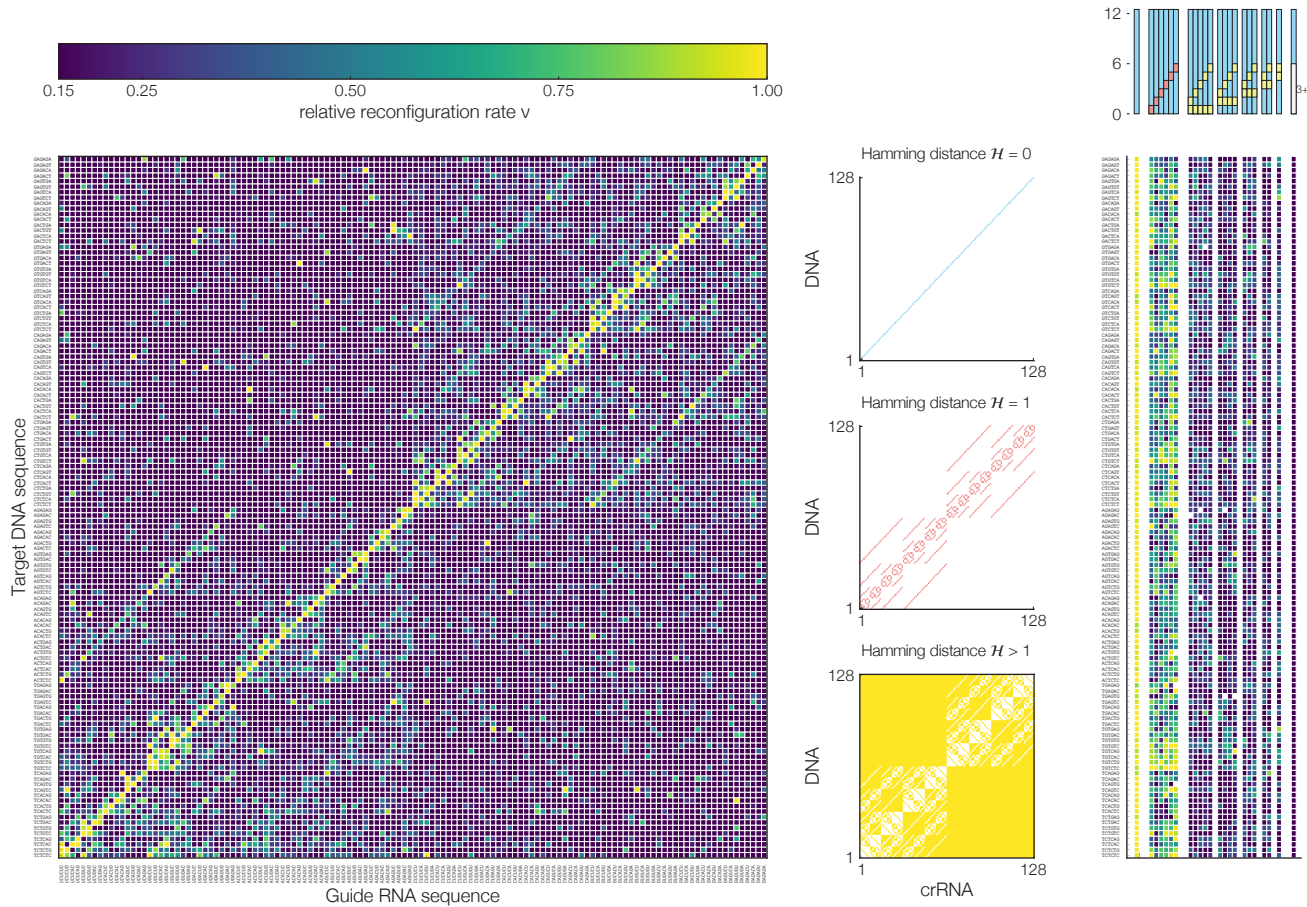

**Fig. S4.** Cross-talk map target DNA dependent mismatch map of the relative reconfiguration rate under 4.5% sucrose (SK) conditions for  $(SWSWSW+WSWSWS)_x(SWSWSW+WSWSWS)$  seed constructs (bases 1-6).

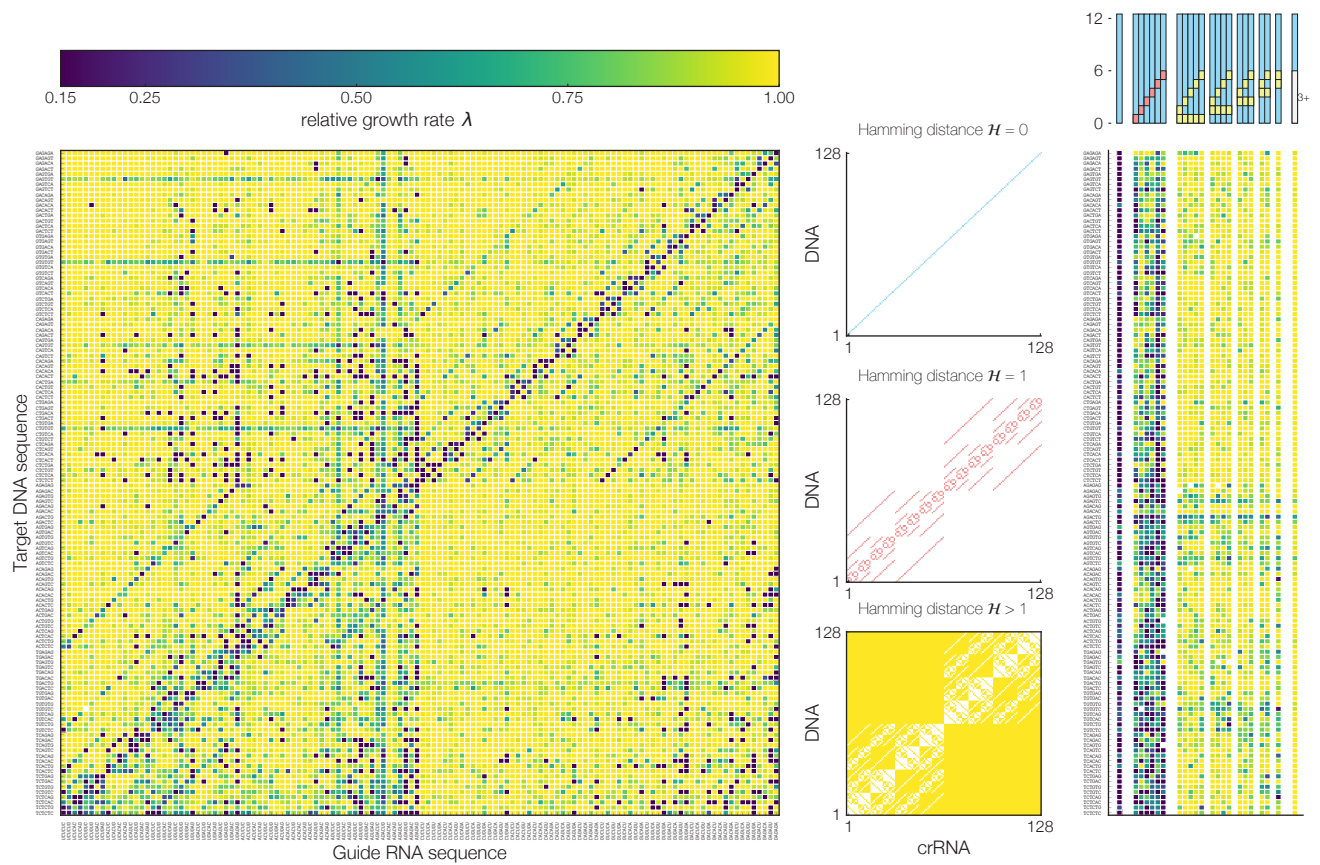

**Fig. S5.** Cross-talk map target DNA dependent mismatch map of the relative growth rate under 10  $\mu$ g/mL tetracycline (TK) conditions for (SWSWSW+WSWSWS) $\times$ (SWSWSW+WSWSWS) seed constructs (bases 1-6).

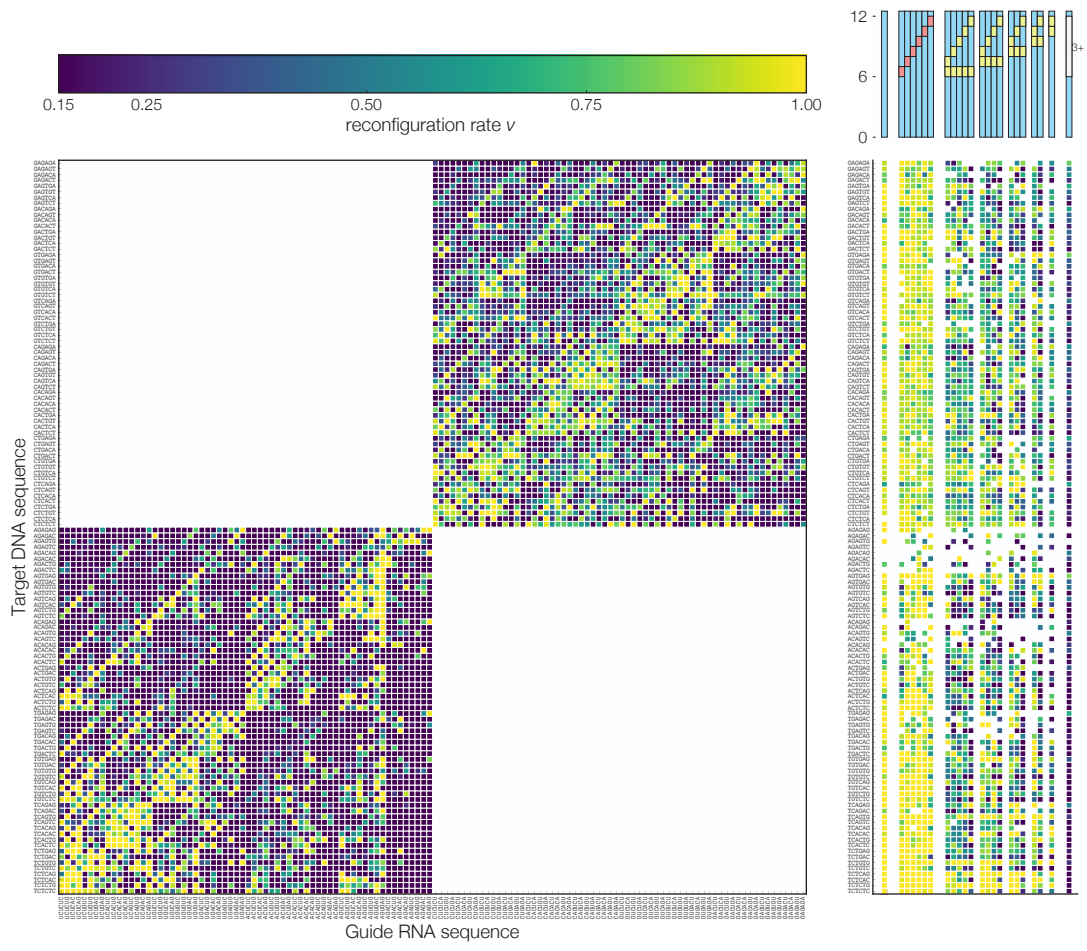

**Fig. S6.** Cross-talk map target DNA dependent mismatch map of the growth rate under 4.5% sucrose (SK) conditions for  $(SWSWSW)_x(SWSWSW) + (WSWSWS)_x(WSWSWS)$  distal constructs (bases 7-12).

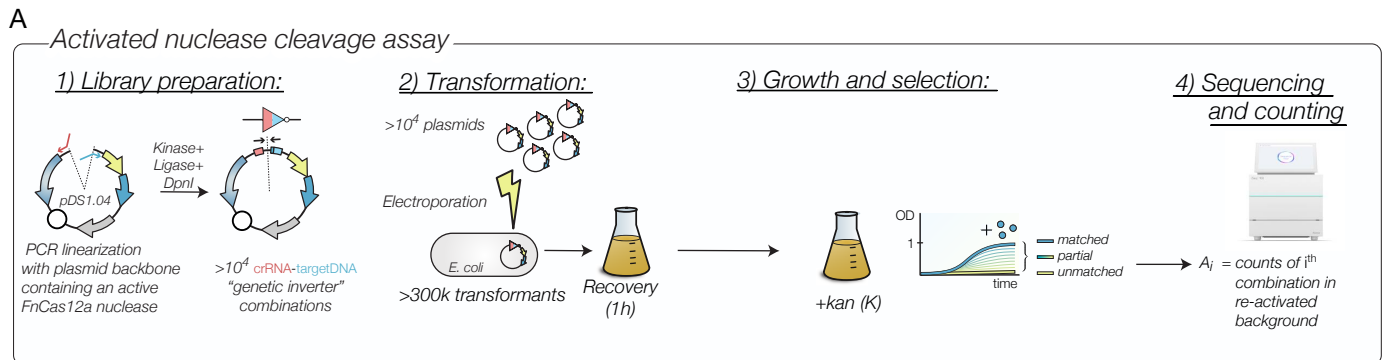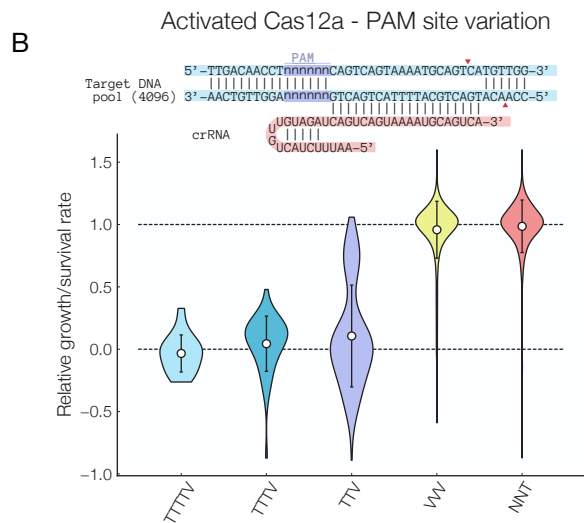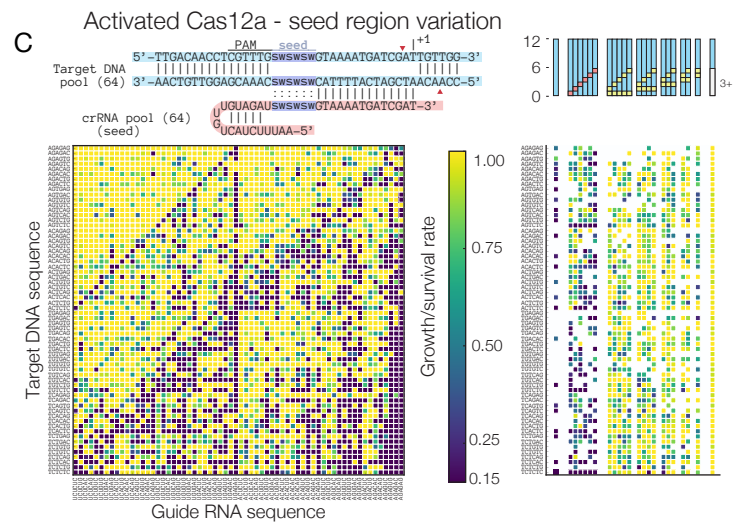

**Fig. S7.** A) Experimental workflow for experiment with activated FnCas12a nuclease sites. B) Relative growth/survival rates for active FnCas12a nuclease that targets a DNA sequence with a 5'-NNNNNN-3' PAM site located at the promoter's -19 position. C) Cross-talk map target DNA dependent mismatch map of the relative density of (SWSWSW+WSWSWS) seed constructs for FnCas12a with active nuclease sites.

188 **SI Dataset S1 (Supplementary-Table-1.xlsx)**  
189 DNA primer and plasmid sequences used in this study.

190 **SI Dataset S2 (<https://github.com/lambert-lab/Massively-parallel-dCas12a-assays>)**  
191 This archive contains all the scripts needed to process the data presented in the manuscript.

192 **SI Dataset S3 (<https://www.ncbi.nlm.nih.gov/Traces/study/?acc=PRJNA549693>)**  
193 Repository for the raw fastq files from sequencing and data generated during this study.

## 194 **SI References**

- 195 [1] Weinert, F. M., Brewster, R. C., Rydenfelt, M., Phillips, R. & Kegel, W. K. Scaling of Gene Expression with  
196 Transcription-Factor Fugacity. *Physical Review Letters* **113**, 258101 (2014).
- 197 [2] Brewster, R. *et al.* The Transcription Factor Titration Effect Dictates Level of Gene Expression. *Cell* **156**, 1312–1323  
198 (2014).
- 199 [3] Jeon, Y. *et al.* Direct observation of DNA target searching and cleavage by CRISPR-Cas12a. *Nature Communications*  
200 **9**, 2777 (2018).
- 201 [4] Jones, D. L. *et al.* Kinetics of dCas9 target search in Escherichia coli. *Science* **357**, 1420–1424 (2017).
- 202 [5] Cleveland, W. S. Robust Locally Weighted Regression and Smoothing Scatterplots. *Journal of the American Statistical*  
203 *Association* **74**, 829–836 (1979).
- 204 [6] Law, C. W., Chen, Y., Shi, W. & Smyth, G. K. voom: precision weights unlock linear model analysis tools for  
205 RNA-seq read counts. *Genome Biology* **15**, R29 (2014).
